# Supplementary material
Source: publisher site journal article supplement (https://static.cambridge.org/content/id/urn:cambridge.org:id:article:S0924270820000034/resource/name/S0924270820000034supp001.doc)
Supplement: Supplementary file 1 [file S0924270820000034supp001.doc]

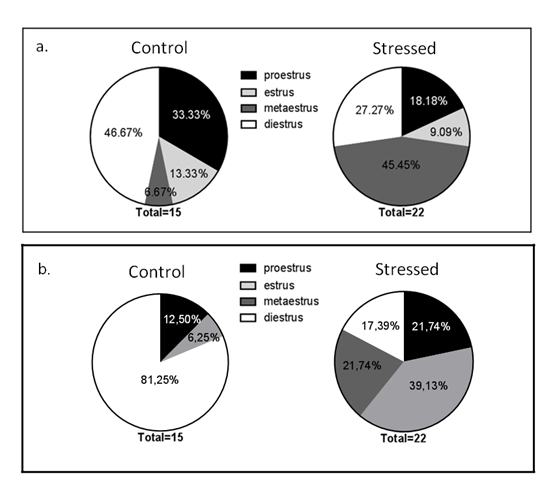


Figure 1S – Percentage of females in each estrous cycle phase observed in the test day of the (a) object recognition task and (b) open field test.

Figure 2S - Open field test in adult female prenatal stressed mice in distinct phases of the estrous cycle. (a) Total distance moved in the arena during 10-min test session by female mice in *proestrus/estrus* and*metestrus*/*diestrus*; (b) Distance travelled in blocks of 5 min in *proestrus/estrus*mice; (c) Distance travelled in blocks of 5 min in *metestrus*/*diestrus* mice; (d) Time spent exploring the center zone of the arena by female mice in *proestrus/estrus* and metestrus/*diestrus*; (e) Percentage of distance moved in the center zone by female mice in *proestrus/estrus* and *metestrus/diestrus*. Data are expressed as mean ± SEM of 3 and 12 *pro/est*, and 12 and 9 *met/die* in control and prenatal stressed groups, respectively.
